# Supplementary material for: Association Between Temporal Changes in Early Repolarization Pattern With Long‐Term Cardiovascular Outcome: A Population‐Based Cohort Study
Source: PubMed Central journal article supplement — J Am Heart Assoc. 2022 Mar 9;11(6):e022848. doi: 10.1161/JAHA.121.022848 (PMC9075315; doi:10.1161/jaha.121.022848), 2022-03-09
Supplement: JAH3-11-e022848-s001.pdf [file JAH3-11-e022848-s001.pdf]

# **SUPPLEMENTAL MATERIAL**

**Table S1. Sensitivity analyses of adjusted hazard ratio of death by excluding subjects with coronary heart disease or chronic heart failure.**

| <b>Variable</b>                   | <b>Baseline ERP</b> | <b>P Value</b> | <b>Time-varying ERP</b> | <b>P Value</b> |
|-----------------------------------|---------------------|----------------|-------------------------|----------------|
| <b>Sudden cardiac death</b>       |                     |                |                         |                |
| Multivariate adjusted HR (95% CI) | 1.16 (0.89-1.51)    | 0.27           | 1.42 (1.06-1.90)        | 0.02           |
| <b>Cardiovascular death</b>       |                     |                |                         |                |
| Multivariate adjusted HR (95% CI) | 1.21 (1.01-1.45)    | 0.04           | 1.55 (1.27-1.89)        | <0.001         |
| <b>Death from any cause</b>       |                     |                |                         |                |
| Multivariate adjusted HR (95% CI) | 1.01 (0.92-1.11)    | 0.79           | 1.07 (1.06-1.19)        | 0.23           |

ERP, early repolarization; HR, hazard ratio; CI, confidence interval.

\*Variables that were included in the multivariate analyses were age, race, sex, hypertension, smoking status, diabetes mellitus, body mass index, blood pressure, total cholesterol, fasting blood glucose, heart rate, QTc duration, presence of left ventricular hypertrophy on ECG, and use of cardiac medications.

**Table S2. Baseline characteristics of subjects according to changes in ERP status.**

| <b>Characteristic</b>                       | <b>Normal-normal</b> | <b>ERP-normal</b> | <b>Normal-ERP</b> | <b>ERP-ERP</b> | <b>P value</b> |
|---------------------------------------------|----------------------|-------------------|-------------------|----------------|----------------|
| No. of subjects                             | 11359                | 477               | 470               | 1051           |                |
| Age, years                                  | 54.2 (5.7)           | 54.2 (5.6)        | 54.2 (5.8)        | 54.2 (5.8)     | 0.87           |
| Males, %                                    | 4592 (40.3)          | 333 (69.8)        | 317 (67.5)        | 816 (77.6)     | <0.001         |
| Caucasians, %                               | 9085 (80.0)          | 283 (59.3)        | 348 (74.0)        | 526 (50.1)     | <0.001         |
| Education, %                                |                      |                   |                   |                |                |
| <High school                                | 2357 (20.8)          | 123 (25.8)        | 106 (22.6)        | 333 (31.7)     | <0.001         |
| High school/vocational school               | 4871 (42.9)          | 170 (35.6)        | 177 (37.7)        | 330 (31.4)     |                |
| College, graduate, or professional school   | 4131 (36.4)          | 184 (38.6)        | 187 (39.8)        | 388 (36.9)     |                |
| Smoking status, %                           |                      |                   |                   |                |                |
| Never                                       | 4951 (43.6)          | 176 (36.9)        | 167 (35.3)        | 326 (31.0)     | <0.001         |
| Former                                      | 3712 (32.7)          | 168 (35.2)        | 176 (37.5)        | 351 (33.4)     |                |
| Current                                     | 2696 (23.7)          | 133 (27.9)        | 127 (27.0)        | 374 (35.6)     |                |
| Hypertension, %                             | 3700 (32.6)          | 159 (33.3)        | 172 (36.6)        | 440 (41.9)     | <0.001         |
| Diabetes, %                                 | 1203 (10.6)          | 51 (10.7)         | 62 (13.2)         | 157 (14.9)     | <0.001         |
| Coronary heart disease, %                   | 462 (4.1)            | 25 (5.2)          | 42 (8.9)          | 85 (8.1)       |                |
| Body mass index, kg/m <sup>2</sup>          | 27.8 (5.3)           | 26.8 (4.9)        | 27.1 (4.9)        | 26.5 (4.5)     | <0.001         |
| Blood pressure, mmHg                        |                      |                   |                   |                |                |
| Systolic                                    | 120.0 (17.8)         | 123.1 (17.7)      | 122.4 (19.4)      | 125.3 (21.3)   | <0.001         |
| Diastolic                                   | 73.0 (10.6)          | 75.8 (11.3)       | 74.3 (11.7)       | 76.1 (13.1)    | <0.001         |
| Fasting glucose, mmol/L                     | 6.0 (2.0)            | 5.9 (2.1)         | 6.2 (2.6)         | 6.2 (2.6)      | <0.001         |
| Total cholesterol, mmol/L                   | 5.6 (1.1)            | 5.5 (1.0)         | 5.5 (1.0)         | 5.5 (1.1)      | 0.12           |
| Low-density lipoprotein cholesterol, mmol/L | 3.6 (1.0)            | 3.5 (1.0)         | 3.6 (1.0)         | 3.6 (1.0)      | 0.12           |

|                                                      |              |              |              |              |        |
|------------------------------------------------------|--------------|--------------|--------------|--------------|--------|
| High-density lipoprotein cholesterol, mmol/L         | 1.3 (0.4)    | 1.4 (0.5)    | 1.3 (0.4)    | 1.3 (0.4)    | 0.07   |
| Triglycerides, mmol/L                                | 1.5 (1.0)    | 1.3 (0.9)    | 1.5 (1.2)    | 1.4 (1.0)    | <0.001 |
| Electrocardiographic findings                        |              |              |              |              |        |
| Heart rate, bpm                                      | 66.4 (10.1)  | 64.2 (9.7)   | 64.7 (9.9)   | 64.5 (10.6)  | 0.06   |
| QTc duration, ms                                     | 416.2 (18.4) | 412.9 (18.7) | 414.4 (21.0) | 415.0 (24.9) | <0.001 |
| Left ventricular hypertrophy on electrocardiogram, % | 129 (1.1)    | 17 (3.6)     | 15 (3.2)     | 99 (9.4)     | <0.001 |
| Medication, %                                        |              |              |              |              |        |
| Calcium antagonist                                   | 354 (3.1)    | 18 (3.8)     | 25 (5.3)     | 41 (3.9)     | 0.04   |
| Digitalis                                            | 145 (1.3)    | 8 (1.7)      | 6 (1.3)      | 25 (2.4)     | 0.03   |
| $\beta$ -Blocker                                     | 597 (5.3)    | 31 (6.5)     | 37 (7.9)     | 64 (6.1)     | 0.05   |
| Antiarrhythmics                                      | 64 (0.6)     | 10 (2.1)     | 3 (0.6)      | 14 (1.3)     | <0.001 |

**Table S3. Hazard ratios of various ERP phenotypes for cardiovascular outcomes in subjects with baseline ERP\*.**

|                           | Sudden cardiac death |                      |         | Cardiovascular death |                      |         | Death from any cause |                      |         |
|---------------------------|----------------------|----------------------|---------|----------------------|----------------------|---------|----------------------|----------------------|---------|
|                           | No. of deaths        | Adjusted HR (95% CI) | p Value | No. of deaths        | Adjusted HR (95% CI) | p Value | No. of deaths        | Adjusted HR (95% CI) | p Value |
| <b>No ERP (N=12315)</b>   | 442                  | 1.00                 |         | 985                  | 1.00                 |         | 4209                 | 1.00                 |         |
| <b>J-wave amplitude</b>   |                      |                      |         |                      |                      |         |                      |                      |         |
| 0.1–0.19 mV (N=1617)      | 114                  | 1.33 (1.06-1.67)     | 0.01    | 211                  | 1.29 (1.10-1.52)     | 0.002   | 718                  | 1.06 (0.97-1.15)     | 0.19    |
| ≥0.2 mV (N=176)           | 15                   | 1.51 (0.89-2.58)     | 0.13    | 43                   | 2.39 (1.74-3.29)     | <0.001  | 106                  | 1.46 (1.20-1.78)     | <0.001  |
| <b>Lead distributions</b> |                      |                      |         |                      |                      |         |                      |                      |         |
| Inferior leads (N=119)    | 7                    | 1.40 (0.66-2.96)     | 0.38    | 12                   | 1.18 (0.67-2.08)     | 0.58    | 51                   | 1.27 (0.97-1.68)     | 0.09    |
| Lateral leads (N=642)     | 39                   | 1.08 (0.77-1.53)     | 0.66    | 72                   | 1.14 (0.89-1.45)     | 0.31    | 266                  | 1.04 (0.91-1.18)     | 0.55    |
| Anterior leads (N=1717)   | 117                  | 1.32 (1.05-1.65)     | 0.02    | 234                  | 1.40 (1.20-1.64)     | <0.001  | 741                  | 1.08 (1.00-1.18)     | 0.06    |

ERP, early repolarization; HR, hazard ratio; CI, confidence interval.

\*Variables that were included in the multivariate analyses were age, race, sex, hypertension, smoking status, diabetes mellitus, history of coronary heart disease or chronic heart failure, body mass index, blood pressure, total cholesterol, fasting blood glucose, heart rate, QTc duration, presence of left ventricular hypertrophy on ECG, and use of cardiac medications.
